# Supplementary material for: Cropping with Vicia villosa and native grass improves soil’s bacterial structure and ecological network in a jujube orchard
Source: PeerJ. 2024 Jun 26;12:e17458. doi: 10.7717/peerj.17458 (PMC11214425; doi:10.7717/peerj.17458)
Supplement: Data S1 [file peerj-12-17458-s001.xlsx]

## Sheet: Fruit
	Single fruit mass/g							Organic acid content/%
	CK	9.01	NG	10.85	VV	10.43		CK	0.241	NG	0.181	VV	0.159
		10.57		12.81		11.21			0.236		0.182		0.159
		10.5		10.89		9.64			0.243		0.177		0.161
		9.58		10.47		10.96		Flavonoid content/(g mg-1)
		9.5		9.72		10.17		CK	26.19	NG	31.24	VV	31.4
		10.27		11.7		10.41			23.47		29.35		31.54
		10.83		11.63		10.17			27.39		28.18		34.74
		10.51		11.05		10.74		Friuit yield per tree (kg)
		10.06		11.15		11.14		CK	12.55	NG	13.85	VV	13.79
		10.54		11.5		10.71			13.15		12.9		12.91
		10.29		9.91		10.26			12.04		12.94		13.74
		10.7		10.03		10.65
		11.34		12.5		12.17
		10.88		10.96		11.71
		11.06		11.13		12.24
		11.22		10.08		12.75
		11.16		9.27		10.57
		11.34		9.4		10.72
		11.67		11.54		11.79
		8.07		10.58		12.16

## Sheet: Soil
	Group	pH	Mositure content(%)	Total nitrogen/(mg kg-1)	Available phosphorus(mg kg-1)	Organic matte(g kg-1)
Interrow soil	CK	7.93	10.04	0.9	16.84	8.68
		7.65	11.05	0.86	15.38	9.28
		7.42	9.69	0.91	17.49	7.96
	NG	7.28	11.6	0.99	18.35	9.68
		7.77	13.08	1.06	16.1	10.41
		7.65	13.39	1.02	17.31	10.99
	VV	7.76	14.13	1.58	19.11	13.17
		7.03	12.85	1.47	16.3	14.66
		7.74	14.24	1.57	17.33	14.8
Rhizosphere soil	CK	7.76	10.35	1	20.57	9.89
		7.49	12.04	0.91	22.74	9.09
		7.34	11.28	0.94	23.11	10.06
	NG	7.21	12.21	1.28	20.81	13.82
		7.54	13.02	1.19	22.72	12.28
		7.59	13.92	1.28	23.31	12.54
	VV	7.31	12.79	1.9	21.15	14.52
		7.1	14.41	1.81	24.27	16.29
		7.73	14.43	1.78	23.61	14.87
