# Supplementary material for: Cropping with Vicia villosa and native grass improves soil’s bacterial structure and ecological network in a jujube orchard
Source: PeerJ. 2024 Jun 26;12:e17458. doi: 10.7717/peerj.17458 (PMC11214425; doi:10.7717/peerj.17458)
Supplement: Supplemental Information 2 [file peerj-12-17458-s002.xlsx]

## Sheet: Sheet2
accession	bioproject_accession	biosample_accession	title																filename6	filename7	filename8
SRR27163982	PRJNA1050666	SAMN38749989	RHCK_1
SRR27163981	PRJNA1050666	SAMN38750150	RHCK.2
SRR27163972	PRJNA1050666	SAMN38750157	RHCK.3
SRR27163971	PRJNA1050666	SAMN38750158	RHVV.1
SRR27163970	PRJNA1050666	SAMN38750190	RHVV.2
SRR27163969	PRJNA1050666	SAMN38750191	RHVV.3
SRR27163968	PRJNA1050666	SAMN38750192	RHNG.1
SRR27163967	PRJNA1050666	SAMN38750193	RHNG.2
SRR27163966	PRJNA1050666	SAMN38750194	RHNG.3
SRR27163965	PRJNA1050666	SAMN38750195	INCK.1
SRR27163980	PRJNA1050666	SAMN38750199	INCK.2
SRR27163979	PRJNA1050666	SAMN38750200	INCK.3
SRR27163978	PRJNA1050666	SAMN38750201	INVV.1
SRR27163977	PRJNA1050666	SAMN38750202	INVV.2
SRR27163976	PRJNA1050666	SAMN38750203	INVV.3
SRR27163975	PRJNA1050666	SAMN38750204	INNG.1
SRR27163974	PRJNA1050666	SAMN38750205	INNG.2
SRR27163973	PRJNA1050666	SAMN38750206	INNG.3
